# Supplementary material for: Valence tautomeric interconversion of bis-dioxolene cobalt complex with imino-pyridine functionalized by TEMPO moiety in solid solutions with isostructural nickel analogue: phase transitions and monocrystal destruction
Source: Royal Society of Chemistry journal article supplement (doi:10.1039/d4dt00453a), 2024-01-01
Supplement: d4dt00453a1.pdf [file d4dt00453a1.pdf]

### SUPPORTING INFORMATION

to the paper: “Valence tautomeric interconversion of bis-dioxolene cobalt complex with imino-pyridine functionalized by TEMPO moiety in solid solutions with isostructural nickel analogue. Phase transitions and monocrystals destruction”, by Alexey A. Zolotukhin, Michael P. Bubnov, Georgy K. Fukin, Roman V. Rumyantsev, Artem S. Bogomyakov.

Table S1. X-ray fluorescence analysis data for solid solutions of complexes **1** and **2**.

|                     |                  |                  |                  |                  |
|---------------------|------------------|------------------|------------------|------------------|
| Initial Co:Ni ratio | 1:1 (50.0:50.0%) | 1:2 (33.3:66.7%) | 1:4 (20.0:80.0%) | 1:8 (11.1:89.9%) |
| Experimental ratio  | 47.85: 52.15     | 39.695:60.305    | 19.60:80.40      | 10.80:89.20      |

Table S2 Details of crystallographic, collection and refinement data for complexes **1\***, **2** and their solid solutions 1:1, 1:4 and 1:8.

| Complex                                         | <b>1 (Co)*</b>                                                  | <b>1:1</b>                                                                                          | <b>1:4</b>                                                                                          | <b>1:4</b>                                                                                          |
|-------------------------------------------------|-----------------------------------------------------------------|-----------------------------------------------------------------------------------------------------|-----------------------------------------------------------------------------------------------------|-----------------------------------------------------------------------------------------------------|
| Empirical formula                               | C <sub>43</sub> H <sub>62</sub> CoN <sub>3</sub> O <sub>5</sub> | C <sub>43</sub> H <sub>62</sub> Co <sub>0.50</sub> N <sub>3</sub> Ni <sub>0.50</sub> O <sub>5</sub> | C <sub>43</sub> H <sub>62</sub> Co <sub>0.20</sub> N <sub>3</sub> Ni <sub>0.80</sub> O <sub>5</sub> | C <sub>43</sub> H <sub>62</sub> Co <sub>0.20</sub> N <sub>3</sub> Ni <sub>0.80</sub> O <sub>5</sub> |
| Formula weight                                  | 759.88                                                          | 759.77                                                                                              | 759.71                                                                                              | 759.71                                                                                              |
| Temperature [K]                                 | 240(2)                                                          | 240(2)                                                                                              | 240(2)                                                                                              | 200(2)                                                                                              |
| Crystal system                                  | Monoclinic                                                      | Monoclinic                                                                                          | Monoclinic                                                                                          | Monoclinic                                                                                          |
| Space group                                     | P2 <sub>1</sub> /c                                              | P2 <sub>1</sub> /c                                                                                  | P2 <sub>1</sub> /c                                                                                  | P2 <sub>1</sub> /c                                                                                  |
| Unit cell dimensions                            |                                                                 |                                                                                                     |                                                                                                     |                                                                                                     |
| a[Å]                                            | 10.7483(2)                                                      | 10.7499(2)                                                                                          | 10.7509(2)                                                                                          | 10.7388(2)                                                                                          |
| b[Å]                                            | 15.8276(4)                                                      | 15.7050(3)                                                                                          | 15.6732(3)                                                                                          | 15.6003(2)                                                                                          |
| c[Å]                                            | 26.6639(6)                                                      | 26.8932(6)                                                                                          | 26.9924(6)                                                                                          | 26.9877(5)                                                                                          |
| β[°]                                            | 101.5058(10)                                                    | 101.056(2)                                                                                          | 100.866(2)                                                                                          | 100.788(2)                                                                                          |
| Volume [Å <sup>3</sup> ]                        | 4444.90(17)                                                     | 4456.03(16)                                                                                         | 4466.70(16)                                                                                         | 4441.30(13)                                                                                         |
| Z                                               | 4                                                               | 4                                                                                                   | 4                                                                                                   | 4                                                                                                   |
| Calculated density [Mg/m <sup>3</sup> ]         | 1.136                                                           | 1.133                                                                                               | 1.130                                                                                               | 1.136                                                                                               |
| Absorption coefficient [mm <sup>-1</sup> ]      | 0.429                                                           | 0.453                                                                                               | 0.467                                                                                               | 0.469                                                                                               |
| F(000)                                          | 1632                                                            | 1634                                                                                                | 1635                                                                                                | 1635                                                                                                |
| Crystal size [mm <sup>3</sup> ]                 | 0.50×0.30×0.16                                                  | 0.42×0.33×0.19                                                                                      | 0.49×0.36×0.28                                                                                      | 0.49×0.36×0.28                                                                                      |
| θ [°]                                           | 2.323 – 27.998                                                  | 2.016 – 27.485                                                                                      | 2.982 – 26.022                                                                                      | 2.984 – 26.021                                                                                      |
| Reflections collected / unique                  | 52187 / 10731                                                   | 60877 / 10211                                                                                       | 59856 / 8800                                                                                        | 60523 / 8752                                                                                        |
| R(int)                                          | 0.0395                                                          | 0.0296                                                                                              | 0.0369                                                                                              | 0.0354                                                                                              |
| Final R indices [I>2σ(I)]                       | R <sub>1</sub> =0.0450,<br>wR <sub>2</sub> =0.1106              | R <sub>1</sub> =0.0351,<br>wR <sub>2</sub> =0.0836                                                  | R <sub>1</sub> =0.0353,<br>wR <sub>2</sub> =0.0820                                                  | R <sub>1</sub> =0.0328,<br>wR <sub>2</sub> =0.0760                                                  |
| R indices (all data)                            | R <sub>1</sub> =0.0637,<br>wR <sub>2</sub> =0.1186              | R <sub>1</sub> =0.0538,<br>wR <sub>2</sub> =0.0938                                                  | R <sub>1</sub> =0.0491,<br>wR <sub>2</sub> =0.0893                                                  | R <sub>1</sub> =0.0435,<br>wR <sub>2</sub> =0.0815                                                  |
| S                                               | 1.024                                                           | 1.032                                                                                               | 1.020                                                                                               | 1.024                                                                                               |
| Largest diff. peak and hole [e/Å <sup>3</sup> ] | 0.341/-0.518                                                    | 0.302/-0.255                                                                                        | 0.264/-0.218                                                                                        | 0.272/-0.229                                                                                        |

| Complex                                         | 1:4                                                                                                    | 1:8                                                                                                    | 1:8                                                                                                    | 1:8                                                                                                    |
|-------------------------------------------------|--------------------------------------------------------------------------------------------------------|--------------------------------------------------------------------------------------------------------|--------------------------------------------------------------------------------------------------------|--------------------------------------------------------------------------------------------------------|
| Empirical formula                               | C <sub>43</sub> H <sub>62</sub> Co <sub>0.20</sub> N <sub>3</sub><br>Ni <sub>0.80</sub> O <sub>5</sub> | C <sub>43</sub> H <sub>62</sub> Co <sub>0.11</sub> N <sub>3</sub><br>Ni <sub>0.89</sub> O <sub>5</sub> | C <sub>43</sub> H <sub>62</sub> Co <sub>0.11</sub> N <sub>3</sub><br>Ni <sub>0.89</sub> O <sub>5</sub> | C <sub>43</sub> H <sub>62</sub> Co <sub>0.11</sub> N <sub>3</sub><br>Ni <sub>0.89</sub> O <sub>5</sub> |
| Formula weight                                  | 759.71                                                                                                 | 759.69                                                                                                 | 759.69                                                                                                 | 759.69                                                                                                 |
| Temperature [K]                                 | 150(2)                                                                                                 | 240(2)                                                                                                 | 200(2)                                                                                                 | 130(2)                                                                                                 |
| Crystal system                                  | Monoclinic                                                                                             | Monoclinic                                                                                             | Monoclinic                                                                                             | Monoclinic                                                                                             |
| Space group                                     | P2 <sub>1</sub> /c                                                                                     | P2 <sub>1</sub> /c                                                                                     | P2 <sub>1</sub> /c                                                                                     | P2 <sub>1</sub> /c                                                                                     |
| Unit cell dimensions                            |                                                                                                        |                                                                                                        |                                                                                                        |                                                                                                        |
| a[Å]                                            | 10.7123(2)                                                                                             | 10.7610(5)                                                                                             | 10.7426(3)                                                                                             | 10.70656(13)                                                                                           |
| b[Å]                                            | 15.4635(2)                                                                                             | 15.6753(6)                                                                                             | 15.6134(4)                                                                                             | 15.45339(16)                                                                                           |
| c[Å]                                            | 26.9889(5)                                                                                             | 27.0721(11)                                                                                            | 27.0073(7)                                                                                             | 26.9829(4)                                                                                             |
| β[°]                                            | 100.441(2)                                                                                             | 100.755(4)                                                                                             | 100.807(2)                                                                                             | 100.6212(12)                                                                                           |
| Volume [Å <sup>3</sup> ]                        | 4396.68(13)                                                                                            | 4486.3(3)                                                                                              | 4449.6(2)                                                                                              | 4387.90(9)                                                                                             |
| Z                                               | 4                                                                                                      | 4                                                                                                      | 4                                                                                                      | 4                                                                                                      |
| Calculated density [Mg/m <sup>3</sup> ]         | 1.148                                                                                                  | 1.125                                                                                                  | 1.134                                                                                                  | 1.150                                                                                                  |
| Absorption coefficient [mm <sup>-1</sup> ]      | 0.474                                                                                                  | 0.469                                                                                                  | 0.473                                                                                                  | 0.480                                                                                                  |
| F(000)                                          | 1635                                                                                                   | 1636                                                                                                   | 1636                                                                                                   | 1636                                                                                                   |
| Crystal size [mm <sup>3</sup> ]                 | 0.49×0.36×0.28                                                                                         | 0.40×0.40×0.20                                                                                         | 0.40×0.40×0.20                                                                                         | 0.60×0.40×0.20                                                                                         |
| ϑ [°]                                           | 2.984 – 26.022                                                                                         | 3.005 – 30.000                                                                                         | 2.983 – 29.999                                                                                         | 2.990 – 29.999                                                                                         |
| Reflections collected / unique                  | 56588 / 8652                                                                                           | 89592 / 13064                                                                                          | 86718 / 12948                                                                                          | 85866 / 12766                                                                                          |
| R(int)                                          | 0.0361                                                                                                 | 0.0835                                                                                                 | 0.0601                                                                                                 | 0.0596                                                                                                 |
| Final R indices [I>2σ(I)]                       | R <sub>1</sub> =0.0314,<br>wR <sub>2</sub> =0.0711                                                     | R <sub>1</sub> =0.0526,<br>wR <sub>2</sub> =0.0905                                                     | R <sub>1</sub> =0.0437,<br>wR <sub>2</sub> =0.0895                                                     | R <sub>1</sub> =0.0436,<br>wR <sub>2</sub> =0.0900                                                     |
| R indices (all data)                            | R <sub>1</sub> =0.0397,<br>wR <sub>2</sub> =0.0749                                                     | R <sub>1</sub> =0.1117,<br>wR <sub>2</sub> =0.1036                                                     | R <sub>1</sub> =0.0752,<br>wR <sub>2</sub> =0.0989                                                     | R <sub>1</sub> =0.0742,<br>wR <sub>2</sub> =0.0994                                                     |
| S                                               | 1.031                                                                                                  | 0.987                                                                                                  | 1.040                                                                                                  | 1.041                                                                                                  |
| Largest diff. peak and hole [e/Å <sup>3</sup> ] | 0.297/-0.229                                                                                           | 0.230/-0.239                                                                                           | 0.263/-0.281                                                                                           | 0.258/-0.297                                                                                           |

| Complex                                         | <b>2 (Ni)</b>                                                   | <b>2 (Ni)</b>                                                   |
|-------------------------------------------------|-----------------------------------------------------------------|-----------------------------------------------------------------|
| Empirical formula                               | C <sub>43</sub> H <sub>62</sub> N <sub>3</sub> NiO <sub>5</sub> | C <sub>43</sub> H <sub>62</sub> N <sub>3</sub> NiO <sub>5</sub> |
| Formula weight                                  | 759.66                                                          | 759.66                                                          |
| Temperature [K]                                 | 240(2)                                                          | 100(2)                                                          |
| Crystal system                                  | Monoclinic                                                      | Monoclinic                                                      |
| Space group                                     | P2 <sub>1</sub> /c                                              | P2 <sub>1</sub> /c                                              |
| Unit cell dimensions                            |                                                                 |                                                                 |
| a[Å]                                            | 10.7157(5)                                                      | 10.7053(2)                                                      |
| b[Å]                                            | 15.5691(8)                                                      | 15.4760(2)                                                      |
| c[Å]                                            | 26.9871(13)                                                     | 26.9999(5)                                                      |
| β[°]                                            | 100.6894(9)                                                     | 100.978(2)                                                      |
| Volume [Å <sup>3</sup> ]                        | 4424.2(4)                                                       | 4391.36(13)                                                     |
| Z                                               | 4                                                               | 4                                                               |
| Calculated density [Mg/m <sup>3</sup> ]         | 1.140                                                           | 1.149                                                           |
| Absorption coefficient [mm <sup>-1</sup> ]      | 0.481                                                           | 0.485                                                           |
| F(000)                                          | 1636                                                            | 1636                                                            |
| Crystal size [mm <sup>3</sup> ]                 | 0.24×0.22×0.10                                                  | 0.49×0.22×0.13                                                  |
| θ [°]                                           | 2.236 – 26.142                                                  | 2.998 – 29.999                                                  |
| Reflections collected / unique                  | 43915 / 8811                                                    | 26975 / 12783                                                   |
| R(int)                                          | 0.1506                                                          | 0.0425                                                          |
| Final R indices [I>2σ(I)]                       | R <sub>1</sub> =0.0462,<br>wR <sub>2</sub> =0.1154              | R <sub>1</sub> =0.0464,<br>wR <sub>2</sub> =0.0876              |
| R indices (all data)                            | R <sub>1</sub> =0.0624,<br>wR <sub>2</sub> =0.1246              | R <sub>1</sub> =0.0845,<br>wR <sub>2</sub> =0.0971              |
| S                                               | 1.043                                                           | 0.978                                                           |
| Largest diff. peak and hole [e/Å <sup>3</sup> ] | 0.330/-0.597                                                    | 0.397/-0.371                                                    |

Table S3. The selected bonds lengths [Å] and angles [deg] in «pure» cobalt (1)\* and nickel (2) complexes and their solid solutions 1:1, 1:4 and 1:8 at different temperatures (T).

| Bond, Å        | 1 (Co)     | 1:1        |            | 1:4        |            |
|----------------|------------|------------|------------|------------|------------|
| M, T           | Co, 240 K  | Co, 240 K  | Ni, 240 K  | Co, 240 K  | Ni, 240 K  |
| M(1)-O(1)      | 2.0271(12) | 2.025(2)   | 2.0226(14) | 2.030(5)   | 2.0231(12) |
| M(1)-O(2)      | 2.0329(13) | 2.021(2)   | 2.0323(15) | 2.022(5)   | 2.0275(13) |
| M(1)-O(3)      | 2.0062(12) | 2.004(2)   | 2.0065(14) | 1.998(5)   | 2.0050(12) |
| M(1)-O(4)      | 2.0659(13) | 2.058(2)   | 2.0553(15) | 2.060(5)   | 2.0557(13) |
| M(1)-N(1)      | 2.1080(14) | 2.085(2)   | 2.0881(16) | 2.077(5)   | 2.0825(15) |
| M(1)-N(2)      | 2.1443(15) | 2.135(2)   | 2.1238(16) | 2.128(5)   | 2.1222(15) |
| O(1)-C(1)      | 1.279(2)   | 1.2830(18) |            | 1.2827(19) |            |
| O(2)-C(2)      | 1.275(2)   | 1.2762(18) |            | 1.2785(19) |            |
| C(1)-C(2)      | 1.470(2)   | 1.468(2)   |            | 1.468(2)   |            |
| O(3)-C(15)     | 1.274(2)   | 1.2786(18) |            | 1.278(2)   |            |
| O(4)-C(16)     | 1.276(2)   | 1.2806(19) |            | 1.281(2)   |            |
| C(15)-C(16)    | 1.464(2)   | 1.463(2)   |            | 1.462(2)   |            |
| O(5)-N(3)      | 1.275(2)   | 1.279(2)   |            | 1.279(2)   |            |
| Angle, deg     | 1 (Co)     | 1:1        |            | 1:4        |            |
| M, T           | Co, 240 K  | Co, 240 K  | Ni, 240 K  | Co, 240 K  | Ni, 240 K  |
| O(1)-M(1)-O(2) | 79.35(5)   | 80.29(8)   | 80.06(5)   | 80.35(18)  | 80.38(5)   |
| O(1)-M(1)-O(3) | 169.94(5)  | 170.76(11) | 170.51(7)  | 170.8(3)   | 170.80(5)  |
| O(1)-M(1)-O(4) | 92.46(5)   | 92.42(9)   | 92.55(6)   | 92.3(2)    | 92.60(5)   |
| O(1)-M(1)-N(1) | 100.64(5)  | 99.20(9)   | 99.18(6)   | 98.6(2)    | 98.61(5)   |
| O(1)-M(1)-N(2) | 93.15(5)   | 93.07(9)   | 93.47(6)   | 93.2(2)    | 93.53(5)   |
| O(2)-M(1)-O(3) | 95.48(5)   | 94.71(9)   | 94.26(6)   | 94.4(2)    | 93.99(5)   |
| O(2)-M(1)-O(4) | 89.86(6)   | 89.00(9)   | 88.74(6)   | 88.5(2)    | 88.47(5)   |
| O(2)-M(1)-N(1) | 92.16(6)   | 92.61(9)   | 92.19(6)   | 92.7(2)    | 92.38(6)   |
| O(2)-M(1)-N(2) | 165.72(5)  | 167.48(11) | 167.40(7)  | 168.1(3)   | 168.10(5)  |
| O(3)-M(1)-O(4) | 78.82(5)   | 79.66(8)   | 79.65(5)   | 79.96(18)  | 79.91(5)   |
| O(3)-M(1)-N(1) | 88.09(5)   | 88.73(9)   | 88.57(6)   | 89.2(2)    | 88.83(5)   |
| O(3)-M(1)-N(2) | 93.66(5)   | 93.23(9)   | 93.49(6)   | 93.3(2)    | 93.26(5)   |
| O(4)-M(1)-N(1) | 166.89(5)  | 168.38(11) | 168.22(7)  | 169.1(3)   | 168.74(5)  |
| O(4)-M(1)-N(2) | 102.69(6)  | 101.96(9)  | 102.42(6)  | 101.8(2)   | 102.09(5)  |
| N(1)-M(1)-N(2) | 77.18(6)   | 77.89(8)   | 78.08(6)   | 78.35(18)  | 78.34(6)   |

| Bond, Å        | 1:4        |            | 1:4        |            | 1:8        |            |
|----------------|------------|------------|------------|------------|------------|------------|
|                | Co, 200 K  | Ni, 200 K  | Co, 150 K  | Ni, 150 K  | Co, 240 K  | Ni, 240 K  |
| M(1)-O(1)      | 2.022(5)   | 2.0197(11) | 1.998(4)   | 2.0032(11) | 2.037(10)  | 2.0258(12) |
| M(1)-O(2)      | 2.015(5)   | 2.0210(12) | 1.996(5)   | 2.0047(11) | 2.023(11)  | 2.0293(13) |
| M(1)-O(3)      | 1.998(5)   | 2.0010(11) | 1.990(4)   | 1.9849(10) | 1.996(10)  | 2.0065(12) |
| M(1)-O(4)      | 2.054(5)   | 2.0533(12) | 2.038(4)   | 2.0352(11) | 2.065(10)  | 2.0593(13) |
| M(1)-N(1)      | 2.075(5)   | 2.0764(13) | 2.057(4)   | 2.0590(12) | 2.077(10)  | 2.0839(15) |
| M(1)-N(2)      | 2.121(5)   | 2.1158(14) | 2.106(5)   | 2.0973(13) | 2.128(11)  | 2.1221(15) |
| O(1)-C(1)      | 1.2845(18) |            | 1.2878(17) |            | 1.2908(19) |            |
| O(2)-C(2)      | 1.2826(18) |            | 1.2875(17) |            | 1.2822(19) |            |
| C(1)-C(2)      | 1.469(2)   |            | 1.468(2)   |            | 1.470(2)   |            |
| O(3)-C(15)     | 1.2795(18) |            | 1.2830(17) |            | 1.282(2)   |            |
| O(4)-C(16)     | 1.2805(19) |            | 1.2856(18) |            | 1.283(2)   |            |
| C(15)-C(16)    | 1.466(2)   |            | 1.465(2)   |            | 1.466(3)   |            |
| O(5)-N(3)      | 1.280(2)   |            | 1.2803(18) |            | 1.281(2)   |            |
| Angle, deg     | 1:1        |            | 1:4        |            | 1:8        |            |
|                | Co, 200 K  | Ni, 200 K  | Co, 150 K  | Ni, 150 K  | Co, 240 K  | Ni, 240 K  |
| O(1)-M(1)-O(2) | 80.77(17)  | 80.69(4)   | 81.80(17)  | 81.44(4)   | 80.5(4)    | 80.59(5)   |
| O(1)-M(1)-O(3) | 171.3(3)   | 171.12(5)  | 172.0(3)   | 171.84(5)  | 170.9(6)   | 171.00(5)  |
| O(1)-M(1)-O(4) | 92.54(19)  | 92.62(5)   | 92.66(18)  | 92.57(4)   | 92.0(4)    | 92.48(5)   |
| O(1)-M(1)-N(1) | 98.35(19)  | 98.38(5)   | 97.87(19)  | 97.65(5)   | 98.4(4)    | 98.50(5)   |
| O(1)-M(1)-N(2) | 93.12(19)  | 93.35(5)   | 92.90(18)  | 93.00(5)   | 93.0(4)    | 93.54(5)   |
| O(2)-M(1)-O(3) | 94.1(2)    | 93.87(5)   | 93.53(19)  | 93.39(4)   | 94.4(5)    | 93.92(5)   |
| O(2)-M(1)-O(4) | 88.45(19)  | 88.31(5)   | 88.17(18)  | 87.99(5)   | 88.4(4)    | 88.36(5)   |
| O(2)-M(1)-N(1) | 92.5(2)    | 92.31(5)   | 92.49(19)  | 92.18(5)   | 92.8(4)    | 92.37(5)   |
| O(2)-M(1)-N(2) | 168.3(3)   | 168.32(5)  | 169.2(2)   | 168.92(5)  | 168.5(6)   | 168.50(5)  |
| O(3)-M(1)-O(4) | 80.20(17)  | 80.15(4)   | 80.71(16)  | 80.88(4)   | 80.3(4)    | 80.17(5)   |
| O(3)-M(1)-N(1) | 88.89(18)  | 88.79(5)   | 88.74(18)  | 88.82(4)   | 89.3(4)    | 88.80(5)   |
| O(3)-M(1)-N(2) | 93.10(19)  | 93.19(5)   | 92.73(18)  | 93.12(5)   | 93.2(4)    | 93.07(5)   |
| O(4)-M(1)-N(1) | 169.1(3)   | 168.94(5)  | 169.4(2)   | 169.69(5)  | 169.6(6)   | 168.97(5)  |
| O(4)-M(1)-N(2) | 101.8(2)   | 102.06(5)  | 101.53(19) | 101.89(5)  | 101.5(5)   | 101.85(5)  |
| N(1)-M(1)-N(2) | 78.45(17)  | 78.55(5)   | 78.85(16)  | 79.01(5)   | 78.7(4)    | 78.64(6)   |

| Bond, Å        | 1:8        |            | 1:8        |            | 2 (Ni)     | 2 (Ni)     |
|----------------|------------|------------|------------|------------|------------|------------|
|                | Co, 200 K  | Ni, 200 K  | Co, 130 K  | Ni, 130 K  | Ni, 240 K  | Ni, 100 K  |
| M(1)-O(1)      | 2.023(8)   | 2.0234(10) | 2.010(8)   | 2.0121(10) | 2.0176(14) | 2.0281(11) |
| M(1)-O(2)      | 1.990(9)   | 2.0244(11) | 1.989(10)  | 2.0225(11) | 2.0204(16) | 2.0268(12) |
| M(1)-O(3)      | 2.005(8)   | 2.0050(10) | 1.996(8)   | 1.9951(10) | 2.0000(14) | 2.0085(10) |
| M(1)-O(4)      | 2.070(8)   | 2.0572(11) | 2.054(8)   | 2.0414(11) | 2.0465(15) | 2.0589(11) |
| M(1)-N(1)      | 2.066(8)   | 2.0791(12) | 2.049(8)   | 2.0612(12) | 2.0727(17) | 2.0771(13) |
| M(1)-N(2)      | 2.147(9)   | 2.1152(13) | 2.143(10)  | 2.1117(13) | 2.1119(18) | 2.1121(14) |
| O(1)-C(1)      | 1.2856(17) |            | 1.2821(17) |            | 1.279(2)   | 1.2862(19) |
| O(2)-C(2)      | 1.2811(17) |            | 1.2730(17) |            | 1.273(2)   | 1.2807(18) |
| C(1)-C(2)      | 1.473(2)   |            | 1.470(2)   |            | 1.465(3)   | 1.475(2)   |
| O(3)-C(15)     | 1.2810(17) |            | 1.2728(17) |            | 1.272(2)   | 1.2801(18) |
| O(4)-C(16)     | 1.2841(17) |            | 1.2791(18) |            | 1.273(3)   | 1.2854(18) |
| C(15)-C(16)    | 1.467(2)   |            | 1.453(2)   |            | 1.471(3)   | 1.474(2)   |
| O(5)-N(3)      | 1.2790(19) |            | 1.2726(19) |            | 1.277(3)   | 1.2828(19) |
| Angle, deg     | 1:1        |            | 1:4        |            | 2 (Ni)     | 2 (Ni)     |
| M, T           | Co, 200 K  | Ni, 200 K  | Co, 150 K  | Ni, 150 K  | Ni, 240 K  | Ni, 100 K  |
| O(1)-M(1)-O(2) | 81.5(3)    | 80.66(4)   | 81.7(3)    | 80.80(4)   | 80.61(6)   | 80.91(4)   |
| O(1)-M(1)-O(3) | 171.4(5)   | 171.13(4)  | 171.5(5)   | 171.15(4)  | 170.93(6)  | 171.55(4)  |
| O(1)-M(1)-O(4) | 92.1(3)    | 92.51(4)   | 92.5(3)    | 92.82(4)   | 92.59(6)   | 92.80(4)   |
| O(1)-M(1)-N(1) | 98.8(4)    | 98.33(4)   | 98.5(4)    | 98.04(4)   | 98.20(6)   | 98.13(5)   |
| O(1)-M(1)-N(2) | 92.5(3)    | 93.45(4)   | 92.4(4)    | 93.29(4)   | 93.59(6)   | 93.15(5)   |
| O(2)-M(1)-O(3) | 95.0(4)    | 93.88(4)   | 94.8(4)    | 93.76(4)   | 93.76(6)   | 93.85(4)   |
| O(2)-M(1)-O(4) | 88.6(3)    | 88.06(5)   | 88.9(3)    | 88.37(5)   | 88.29(6)   | 88.03(5)   |
| O(2)-M(1)-N(1) | 93.8(4)    | 92.44(5)   | 93.5(4)    | 92.11(5)   | 92.39(7)   | 92.27(5)   |
| O(2)-M(1)-N(2) | 169.2(5)   | 168.49(5)  | 169.3(5)   | 168.53(4)  | 168.60(6)  | 168.50(5)  |
| O(3)-M(1)-O(4) | 80.0(3)    | 80.26(4)   | 79.7(3)    | 79.99(4)   | 80.07(6)   | 80.33(4)   |
| O(3)-M(1)-N(1) | 89.2(3)    | 88.83(4)   | 89.4(3)    | 89.08(4)   | 89.09(6)   | 88.65(5)   |
| O(3)-M(1)-N(2) | 92.2(3)    | 93.09(5)   | 92.3(4)    | 93.23(5)   | 93.13(6)   | 93.12(5)   |
| O(4)-M(1)-N(1) | 169.1(4)   | 169.09(4)  | 169.0(5)   | 169.06(5)  | 169.16(6)  | 168.98(5)  |
| O(4)-M(1)-N(2) | 100.6(4)   | 102.14(5)  | 100.3(4)   | 101.80(5)  | 101.84(7)  | 102.16(5)  |
| N(1)-M(1)-N(2) | 78.1(3)    | 78.56(5)   | 78.5(3)    | 78.92(5)   | 78.65(7)   | 78.76(5)   |

Table S4. Selected topological characteristics in CP(3, -1), corresponding to intermolecular interactions in crystals of «pure» cobalt (1)\* and nickel (2) complexes and their solid solution 1:8 at 240 K.

| Bond            | $\rho(r)$ , a.u. | $\nabla^2\rho(r)$ , a.u. | $v(r)$ , a.u. | $h_e$ , a.u. | $E_{EML}$<br>kcal/mol** |
|-----------------|------------------|--------------------------|---------------|--------------|-------------------------|
| <b>Ni</b>       |                  |                          |               |              |                         |
| <b>O...H</b>    |                  |                          |               |              |                         |
| O(5)...H(32)    | 0.013            | 0.054                    | -0.009        | 0.002        | 2.75                    |
| H(32)...O(5)    | 0.013            | 0.054                    | -0.009        | 0.002        | 2.75                    |
| O(5)...H(34)    | 0.004            | 0.019                    | -0.002        | 0.001        | 0.70                    |
| H(34)...O(5)    | 0.004            | 0.019                    | -0.002        | 0.001        | 0.70                    |
| <b>C...H</b>    |                  |                          |               |              |                         |
| H(31)...C(1)    | 0.006            | 0.029                    | -0.003        | 0.002        | 1.07                    |
| C(14)...H(30)   | 0.004            | 0.018                    | -0.002        | 0.001        | 0.68                    |
| H(28A)...C(34)  | 0.004            | 0.019                    | -0.002        | 0.001        | 0.68                    |
| H(30)...C(14)   | 0.004            | 0.018                    | -0.002        | 0.001        | 0.68                    |
| C(34)...H(28A)  | 0.004            | 0.019                    | -0.002        | 0.001        | 0.68                    |
| C(4)...H(12A)   | 0.004            | 0.017                    | -0.002        | 0.001        | 0.64                    |
| H(12A)...C(4)   | 0.004            | 0.017                    | -0.002        | 0.001        | 0.64                    |
| H(14B)...C(19)  | 0.004            | 0.014                    | -0.002        | 0.001        | 0.56                    |
| C(19)...H(14B)  | 0.004            | 0.014                    | -0.002        | 0.001        | 0.56                    |
| H(8B)...C(14)   | 0.002            | 0.009                    | -0.001        | 0.001        | 0.31                    |
| C(14)...H(8B)   | 0.002            | 0.009                    | -0.001        | 0.001        | 0.31                    |
| H(39B)...C(41)  | 0.001            | 0.006                    | -0.001        | 0.0005       | 0.18                    |
| <b>C...C</b>    |                  |                          |               |              |                         |
| C(29)...C(30)   | 0.005            | 0.016                    | -0.002        | 0.001        | 0.73                    |
| C(30)...C(29)   | 0.005            | 0.016                    | -0.002        | 0.001        | 0.73                    |
| <b>H...H</b>    |                  |                          |               |              |                         |
| H(28B)...H(34)  | 0.005            | 0.020                    | -0.002        | 0.001        | 0.77                    |
| H(34)...H(28B)  | 0.005            | 0.020                    | -0.002        | 0.001        | 0.77                    |
| H(9A)...H(27B)  | 0.003            | 0.020                    | -0.002        | 0.001        | 0.68                    |
| H(23B)...H(42C) | 0.004            | 0.020                    | -0.002        | 0.001        | 0.68                    |
| H(27B)...H(9A)  | 0.003            | 0.020                    | -0.002        | 0.001        | 0.68                    |
| H(42C)...H(23B) | 0.004            | 0.020                    | -0.002        | 0.001        | 0.68                    |
| H(10A)...H(43B) | 0.003            | 0.020                    | -0.002        | 0.001        | 0.67                    |
| H(43B)...H(10A) | 0.003            | 0.020                    | -0.002        | 0.001        | 0.67                    |
| H(27C)...H(30)  | 0.004            | 0.017                    | -0.002        | 0.001        | 0.62                    |
| H(30)...H(27C)  | 0.004            | 0.017                    | -0.002        | 0.001        | 0.62                    |
| H(19)...H(36A)  | 0.002            | 0.020                    | -0.002        | 0.002        | 0.58                    |
| H(36A)...H(19)  | 0.002            | 0.020                    | -0.002        | 0.002        | 0.58                    |
| H(10C)...H(24C) | 0.003            | 0.015                    | -0.002        | 0.001        | 0.52                    |
| H(24C)...H(10C) | 0.003            | 0.015                    | -0.002        | 0.001        | 0.52                    |
| H(4)...H(13C)   | 0.003            | 0.015                    | -0.002        | 0.001        | 0.51                    |
| H(13C)...H(4)   | 0.003            | 0.015                    | -0.002        | 0.001        | 0.51                    |
| H(14A)...H(31)  | 0.003            | 0.014                    | -0.002        | 0.001        | 0.50                    |
| H(31)...H(14A)  | 0.003            | 0.014                    | -0.002        | 0.001        | 0.50                    |
| H(26C)...H(41A) | 0.003            | 0.013                    | -0.001        | 0.001        | 0.44                    |
| H(41A)...H(26C) | 0.003            | 0.013                    | -0.001        | 0.001        | 0.44                    |
| H(8B)...H(12C)  | 0.003            | 0.012                    | -0.001        | 0.001        | 0.43                    |
| H(12C)...H(8B)  | 0.003            | 0.012                    | -0.001        | 0.001        | 0.43                    |
| H(5)...H(42A)   | 0.003            | 0.011                    | -0.001        | 0.001        | 0.40                    |
| H(42A)...H(5)   | 0.003            | 0.011                    | -0.001        | 0.001        | 0.40                    |
| H(19)...H(40B)  | 0.002            | 0.012                    | -0.001        | 0.001        | 0.39                    |



|                 |       |       |         |        |      |
|-----------------|-------|-------|---------|--------|------|
| H(40B)...H(19)  | 0.002 | 0.012 | -0.001  | 0.001  | 0.39 |
| H(24A)...H(26A) | 0.002 | 0.012 | -0.001  | 0.001  | 0.37 |
| H(26A)...H(24A) | 0.002 | 0.012 | -0.001  | 0.001  | 0.37 |
| H(13B)...H(18)  | 0.002 | 0.010 | -0.001  | 0.001  | 0.34 |
| H(18)...H(13B)  | 0.002 | 0.010 | -0.001  | 0.001  | 0.34 |
| H(23B)...H(35)  | 0.002 | 0.011 | -0.001  | 0.001  | 0.34 |
| H(35)...H(23B)  | 0.002 | 0.011 | -0.001  | 0.001  | 0.34 |
| H(4)...H(43C)   | 0.002 | 0.009 | -0.001  | 0.001  | 0.30 |
| H(27B)...H(29)  | 0.002 | 0.009 | -0.001  | 0.001  | 0.30 |
| H(29)...H(27B)  | 0.002 | 0.009 | -0.001  | 0.001  | 0.30 |
| H(43C)...H(4)   | 0.002 | 0.009 | -0.001  | 0.001  | 0.30 |
| H(28A)...H(36A) | 0.002 | 0.007 | -0.001  | 0.001  | 0.24 |
| H(36A)...H(28A) | 0.002 | 0.007 | -0.001  | 0.001  | 0.24 |
| H(9B)...H(26B)  | 0.001 | 0.007 | -0.001  | 0.001  | 0.22 |
| H(26B)...H(9B)  | 0.001 | 0.007 | -0.0007 | 0.0005 | 0.22 |
| H(24A)...H(28C) | 0.001 | 0.007 | -0.001  | 0.001  | 0.21 |
| H(28C)...H(24A) | 0.001 | 0.007 | -0.001  | 0.001  | 0.21 |
| H(24B)...H(40A) | 0.001 | 0.007 | -0.001  | 0.001  | 0.20 |
| H(40A)...H(24B) | 0.001 | 0.007 | -0.001  | 0.001  | 0.20 |
| H(12C)...H(22B) | 0.001 | 0.005 | -0.001  | 0.0004 | 0.16 |
| H(22B)...H(12C) | 0.001 | 0.005 | -0.001  | 0.0004 | 0.16 |
| H(26B)...H(40C) | 0.001 | 0.004 | -0.0004 | 0.0003 | 0.11 |
| H(40C)...H(26B) | 0.001 | 0.004 | -0.0004 | 0.0003 | 0.11 |
| H(9C)...H(32)   | 0.001 | 0.003 | -0.0003 | 0.0003 | 0.10 |
| H(32)...H(9C)   | 0.001 | 0.003 | -0.0003 | 0.0003 | 0.10 |
| H(10B)...H(40C) | 0.001 | 0.003 | -0.0003 | 0.0002 | 0.08 |
| H(40C)...H(10B) | 0.001 | 0.003 | -0.0003 | 0.0002 | 0.08 |
| Total energy    |       |       |         |        | ~36  |
| <b>Co</b>       |       |       |         |        |      |
| <b>O...H</b>    |       |       |         |        |      |
| O(5)...H(32)    | 0.012 | 0.049 | -0.008  | 0.002  | 2.47 |
| H(32)...O(5)    | 0.012 | 0.049 | -0.008  | 0.002  | 2.47 |
| <b>C...H</b>    |       |       |         |        |      |
| C(1)...H(31)    | 0.006 | 0.030 | -0.004  | 0.002  | 1.18 |
| H(31)...C(1)    | 0.006 | 0.030 | -0.004  | 0.002  | 1.18 |
| C(34)...H(28A)  | 0.004 | 0.019 | -0.002  | 0.001  | 0.69 |
| H(28A)...C(34)  | 0.004 | 0.019 | -0.002  | 0.001  | 0.69 |
| H(30)...C(14)   | 0.004 | 0.017 | -0.002  | 0.001  | 0.67 |
| C(14)...H(30)   | 0.004 | 0.017 | -0.002  | 0.001  | 0.67 |
| C(4)...H(12A)   | 0.004 | 0.017 | -0.002  | 0.001  | 0.62 |
| H(12A)...C(4)   | 0.004 | 0.017 | -0.002  | 0.001  | 0.62 |
| H(14B)...C(19)  | 0.004 | 0.013 | -0.002  | 0.001  | 0.52 |
| C(19)...H(14B)  | 0.004 | 0.013 | -0.002  | 0.001  | 0.52 |
| C(4)...H(43C)   | 0.003 | 0.010 | -0.001  | 0.001  | 0.35 |
| H(43C)...C(4)   | 0.003 | 0.010 | -0.001  | 0.001  | 0.35 |
| H(8B)...C(14)   | 0.002 | 0.009 | -0.001  | 0.001  | 0.31 |
| C(14)...H(8B)   | 0.002 | 0.009 | -0.001  | 0.001  | 0.31 |
| H(39B)...C(41)  | 0.001 | 0.005 | -0.0004 | 0.0004 | 0.13 |
| C(41)...H(39B)  | 0.001 | 0.005 | -0.0004 | 0.0004 | 0.13 |
| <b>C...C</b>    |       |       |         |        |      |
| C(29)...C(30)   | 0.005 | 0.016 | -0.002  | 0.001  | 0.71 |
| C(30)...C(29)   | 0.005 | 0.016 | -0.002  | 0.001  | 0.71 |

| H...H           |       |       |         |        |      |
|-----------------|-------|-------|---------|--------|------|
| H(34)...H(28B)  | 0.004 | 0.019 | -0.002  | 0.001  | 0.72 |
| H(28B)...H(34)  | 0.004 | 0.019 | -0.002  | 0.001  | 0.72 |
| H(9A)...H(27B)  | 0.003 | 0.019 | -0.002  | 0.001  | 0.61 |
| H(27B)...H(9A)  | 0.003 | 0.019 | -0.002  | 0.001  | 0.61 |
| H(23B)...H(42C) | 0.003 | 0.017 | -0.002  | 0.001  | 0.59 |
| H(42C)...H(23B) | 0.003 | 0.017 | -0.002  | 0.001  | 0.59 |
| H(10A)...H(43B) | 0.003 | 0.018 | -0.002  | 0.001  | 0.58 |
| H(43B)...H(10A) | 0.003 | 0.018 | -0.002  | 0.001  | 0.58 |
| H(27C)...H(30)  | 0.004 | 0.016 | -0.002  | 0.001  | 0.56 |
| H(30)...H(27C)  | 0.004 | 0.016 | -0.002  | 0.001  | 0.56 |
| H(19)...H(36A)  | 0.002 | 0.018 | -0.002  | 0.001  | 0.54 |
| H(36A)...H(19)  | 0.002 | 0.018 | -0.002  | 0.001  | 0.54 |
| H(4)...H(13C)   | 0.003 | 0.015 | -0.002  | 0.001  | 0.53 |
| H(13C)...H(4)   | 0.003 | 0.015 | -0.002  | 0.001  | 0.53 |
| H(26C)...H(41A) | 0.003 | 0.015 | -0.002  | 0.001  | 0.52 |
| H(41A)...H(26C) | 0.003 | 0.015 | -0.002  | 0.001  | 0.52 |
| H(10C)...H(24C) | 0.003 | 0.014 | -0.002  | 0.001  | 0.51 |
| H(24C)...H(10C) | 0.003 | 0.014 | -0.002  | 0.001  | 0.51 |
| H(14A)...H(31)  | 0.003 | 0.014 | -0.002  | 0.001  | 0.49 |
| H(31)...H(14A)  | 0.003 | 0.014 | -0.002  | 0.001  | 0.49 |
| H(5)...H(42A)   | 0.003 | 0.012 | -0.001  | 0.001  | 0.45 |
| H(42A)...H(5)   | 0.003 | 0.012 | -0.001  | 0.001  | 0.45 |
| H(19)...H(40B)  | 0.002 | 0.012 | -0.001  | 0.001  | 0.39 |
| H(40B)...H(19)  | 0.002 | 0.012 | -0.001  | 0.001  | 0.39 |
| H(12C)...H(8B)  | 0.002 | 0.010 | -0.001  | 0.001  | 0.34 |
| H(8B)...H(12C)  | 0.002 | 0.010 | -0.001  | 0.001  | 0.34 |
| H(13B)...H(18)  | 0.002 | 0.010 | -0.001  | 0.001  | 0.34 |
| H(18)...H(13B)  | 0.002 | 0.010 | -0.001  | 0.001  | 0.34 |
| H(27B)...H(29)  | 0.002 | 0.010 | -0.001  | 0.001  | 0.32 |
| H(29)...H(27B)  | 0.002 | 0.010 | -0.001  | 0.001  | 0.32 |
| H(23B)...H(35)  | 0.002 | 0.010 | -0.001  | 0.001  | 0.31 |
| H(35)...H(23B)  | 0.002 | 0.010 | -0.001  | 0.001  | 0.31 |
| H(24A)...H(26A) | 0.002 | 0.009 | -0.001  | 0.001  | 0.30 |
| H(26A)...H(24A) | 0.002 | 0.009 | -0.001  | 0.001  | 0.30 |
| H(24A)...H(28C) | 0.002 | 0.008 | -0.001  | 0.001  | 0.25 |
| H(28C)...H(24A) | 0.002 | 0.008 | -0.001  | 0.001  | 0.25 |
| H(9B)...H(26B)  | 0.002 | 0.008 | -0.001  | 0.001  | 0.24 |
| H(26B)...H(9B)  | 0.002 | 0.008 | -0.001  | 0.001  | 0.24 |
| H(24B)...H(40A) | 0.001 | 0.006 | -0.001  | 0.001  | 0.17 |
| H(40A)...H(24B) | 0.001 | 0.006 | -0.001  | 0.001  | 0.17 |
| H(12C)...H(22B) | 0.001 | 0.005 | -0.001  | 0.000  | 0.16 |
| H(22B)...H(12C) | 0.001 | 0.005 | -0.001  | 0.0004 | 0.16 |
| H(10B)...H(40C) | 0.001 | 0.005 | -0.0004 | 0.0004 | 0.14 |
| H(40C)...H(10B) | 0.001 | 0.005 | -0.0004 | 0.0004 | 0.14 |
| H(26B)...H(40C) | 0.001 | 0.004 | -0.0004 | 0.0003 | 0.13 |
| H(40C)...H(26B) | 0.001 | 0.004 | -0.0004 | 0.0003 | 0.13 |
| H(9C)...H(32)   | 0.001 | 0.004 | -0.0004 | 0.000  | 0.12 |
| H(32)...H(9C)   | 0.001 | 0.004 | -0.0004 | 0.0003 | 0.12 |
| Total energy    |       |       |         |        | ~34  |

| <b>Co/Ni 1:8</b> |       |       |        |       |      |
|------------------|-------|-------|--------|-------|------|
| <b>O...H</b>     |       |       |        |       |      |
| O(5)...H(32)     | 0.013 | 0.051 | -0.008 | 0.002 | 2.58 |
| H(32)...O(5)     | 0.013 | 0.051 | -0.008 | 0.002 | 2.58 |
| O(5)...H(34)     | 0.004 | 0.016 | -0.002 | 0.001 | 0.58 |
| H(34)...O(5)     | 0.004 | 0.016 | -0.002 | 0.001 | 0.58 |
| <b>C...H</b>     |       |       |        |       |      |
| H(31)...C(1)     | 0.006 | 0.027 | -0.003 | 0.002 | 1.04 |
| C(1)...H(31)     | 0.006 | 0.027 | -0.003 | 0.002 | 1.04 |
| C(14)...H(30)    | 0.004 | 0.017 | -0.002 | 0.001 | 0.64 |
| H(30)...C(14)    | 0.004 | 0.017 | -0.002 | 0.001 | 0.64 |
| C(4)...H(12A)    | 0.004 | 0.017 | -0.002 | 0.001 | 0.61 |
| H(12A)...C(4)    | 0.004 | 0.017 | -0.002 | 0.001 | 0.61 |
| H(14B)...C(19)   | 0.004 | 0.013 | -0.002 | 0.001 | 0.47 |
| C(19)...H(14B)   | 0.004 | 0.013 | -0.002 | 0.001 | 0.47 |
| H(8B)...C(14)    | 0.002 | 0.009 | -0.001 | 0.001 | 0.31 |
| C(14)...H(8B)    | 0.002 | 0.009 | -0.001 | 0.001 | 0.31 |
| H(39B)...C(41)   | 0.001 | 0.005 | -0.001 | 0.000 | 0.16 |
| <b>C...C</b>     |       |       |        |       |      |
| C(29)...C(30)    | 0.005 | 0.016 | -0.002 | 0.001 | 0.72 |
| C(30)...C(29)    | 0.005 | 0.016 | -0.002 | 0.001 | 0.72 |
| <b>H...H</b>     |       |       |        |       |      |
| H(34)...H(28B)   | 0.004 | 0.019 | -0.002 | 0.001 | 0.70 |
| H(28B)...H(34)   | 0.004 | 0.019 | -0.002 | 0.001 | 0.70 |
| H(23B)...H(42C)  | 0.003 | 0.019 | -0.002 | 0.001 | 0.64 |
| H(42C)...H(23B)  | 0.003 | 0.019 | -0.002 | 0.001 | 0.64 |
| H(9A)...H(27B)   | 0.003 | 0.019 | -0.002 | 0.001 | 0.62 |
| H(10A)...H(43B)  | 0.003 | 0.019 | -0.002 | 0.001 | 0.62 |
| H(27B)...H(9A)   | 0.003 | 0.019 | -0.002 | 0.001 | 0.62 |
| H(43B)...H(10A)  | 0.003 | 0.019 | -0.002 | 0.001 | 0.62 |
| H(27C)...H(30)   | 0.004 | 0.016 | -0.002 | 0.001 | 0.56 |
| H(30)...H(27C)   | 0.004 | 0.016 | -0.002 | 0.001 | 0.56 |
| H(19)...H(36A)   | 0.002 | 0.017 | -0.002 | 0.001 | 0.51 |
| H(10C)...H(24C)  | 0.003 | 0.014 | -0.002 | 0.001 | 0.50 |
| H(24C)...H(10C)  | 0.003 | 0.014 | -0.002 | 0.001 | 0.50 |
| H(4)...H(13C)    | 0.003 | 0.014 | -0.002 | 0.001 | 0.49 |
| H(13C)...H(4)    | 0.003 | 0.014 | -0.002 | 0.001 | 0.49 |
| H(14A)...H(31)   | 0.003 | 0.013 | -0.002 | 0.001 | 0.48 |
| H(31)...H(14A)   | 0.003 | 0.013 | -0.002 | 0.001 | 0.48 |
| H(26C)...H(41A)  | 0.003 | 0.013 | -0.001 | 0.001 | 0.41 |
| H(41A)...H(26C)  | 0.003 | 0.013 | -0.001 | 0.001 | 0.41 |
| H(5)...H(42A)    | 0.003 | 0.011 | -0.001 | 0.001 | 0.40 |
| H(8B)...H(12C)   | 0.003 | 0.011 | -0.001 | 0.001 | 0.40 |
| H(12C)...H(8B)   | 0.003 | 0.011 | -0.001 | 0.001 | 0.40 |
| H(42A)...H(5)    | 0.003 | 0.011 | -0.001 | 0.001 | 0.40 |
| H(19)...H(40B)   | 0.002 | 0.012 | -0.001 | 0.001 | 0.38 |
| H(40B)...H(19)   | 0.002 | 0.012 | -0.001 | 0.001 | 0.38 |
| H(13B)...H(18)   | 0.002 | 0.009 | -0.001 | 0.001 | 0.32 |
| H(18)...H(13B)   | 0.002 | 0.009 | -0.001 | 0.001 | 0.32 |
| H(24A)...H(26A)  | 0.002 | 0.010 | -0.001 | 0.001 | 0.32 |
| H(26A)...H(24A)  | 0.002 | 0.010 | -0.001 | 0.001 | 0.32 |
| H(23B)...H(35)   | 0.002 | 0.010 | -0.001 | 0.001 | 0.30 |

|                 |       |       |         |        |      |
|-----------------|-------|-------|---------|--------|------|
| H(35)...H(23B)  | 0.002 | 0.010 | -0.001  | 0.001  | 0.30 |
| H(4)...H(43C)   | 0.002 | 0.008 | -0.001  | 0.001  | 0.28 |
| H(27B)...H(29)  | 0.002 | 0.009 | -0.001  | 0.001  | 0.28 |
| H(29)...H(27B)  | 0.002 | 0.009 | -0.001  | 0.001  | 0.28 |
| H(43C)...H(4)   | 0.002 | 0.008 | -0.001  | 0.001  | 0.28 |
| H(24A)...H(28C) | 0.002 | 0.008 | -0.001  | 0.001  | 0.24 |
| H(28C)...H(24A) | 0.002 | 0.008 | -0.001  | 0.001  | 0.24 |
| H(9B)...H(26B)  | 0.001 | 0.007 | -0.001  | 0.001  | 0.21 |
| H(26B)...H(9B)  | 0.001 | 0.007 | -0.001  | 0.001  | 0.21 |
| H(28A)...H(36A) | 0.002 | 0.007 | -0.001  | 0.0005 | 0.21 |
| H(36A)...H(28A) | 0.002 | 0.007 | -0.001  | 0.0005 | 0.21 |
| H(24B)...H(40A) | 0.001 | 0.007 | -0.001  | 0.001  | 0.20 |
| H(40A)...H(24B) | 0.001 | 0.007 | -0.001  | 0.001  | 0.20 |
| H(12C)...H(22B) | 0.001 | 0.005 | -0.0005 | 0.0004 | 0.15 |
| H(36A)...H(19)  | 0.002 | 0.017 | -0.002  | 0.001  | 0.51 |
| H(26B)...H(40C) | 0.001 | 0.004 | -0.0003 | 0.0003 | 0.11 |
| H(40C)...H(26B) | 0.001 | 0.004 | -0.0003 | 0.0003 | 0.11 |
| H(9C)...H(32)   | 0.001 | 0.003 | -0.0003 | 0.0002 | 0.09 |
| H(10B)...H(40C) | 0.001 | 0.003 | -0.0003 | 0.0002 | 0.09 |
| H(32)...H(9C)   | 0.001 | 0.003 | -0.0003 | 0.0002 | 0.09 |
| H(40C)...H(10B) | 0.001 | 0.003 | -0.0003 | 0.0002 | 0.09 |
| Total energy    |       |       |         |        | 33   |

Table S5. Unit cell parameters for solid solution 1:4 at 240, 200 and 150 K.

| Temperature | <i>a</i> (Å) | <i>b</i> (Å) | <i>c</i> (Å) | $\beta$ (°) | <i>V</i> (Å <sup>3</sup> ) | <i>V</i> <sub>molecule</sub> (Å <sup>3</sup> ) |
|-------------|--------------|--------------|--------------|-------------|----------------------------|------------------------------------------------|
| 240         | 10.7509(2)   | 15.6732(3)   | 26.9924(6)   | 100.866(2)  | 4466.70(16)                | 1116.7                                         |
| 200         | 10.7388(2)   | 15.6003(2)   | 26.9877(5)   | 100.788(2)  | 4441.30(13)                | 1110.3                                         |
| 150         | 10.7123(2)   | 15.4635(2)   | 26.9889(5)   | 100.441(2)  | 4396.68(13)                | 1099.2                                         |

Table S6. The voids in a unit cell for solid solution 1:4 at 240, 200 and 150 K.

| Temperature | Number of voids in a unit cell | Volume of voids, Å <sup>3</sup> | Total volume of voids in a unit cell, Å <sup>3</sup> |
|-------------|--------------------------------|---------------------------------|------------------------------------------------------|
| 240         | 12                             | 14 – 51                         | 392                                                  |
| 200         | 12                             | 13 – 49                         | 370                                                  |
| 150         | 12                             | 11 – 45                         | 349                                                  |

Table S7. Short contacts in crystals of “pure” cobalt and nickel complexes, as well as their solid solutions 1:1, 1:4 and 1:8 at different temperatures.

| Number                   | Atom1 | Atom2 | Length | Length-VdW | Symm. op. 2      |
|--------------------------|-------|-------|--------|------------|------------------|
| <b>1 (Co), T = 240 K</b> |       |       |        |            |                  |
| 1                        | C34   | C28   | 3.351  | -0.049     | -1+x,y,z         |
| 2                        | O5    | C32   | 2.897  | -0.323     | 1-x,-1/2+y,1/2-z |
| 3                        | O5    | H32   | 2.474  | -0.246     | 1-x,-1/2+y,1/2-z |
| 4                        | C1    | H31   | 2.693  | -0.207     | 1-x,1-y,1-z      |
| <b>1:1, T = 240 K</b>    |       |       |        |            |                  |
| 1                        | C34   | C28   | 3.363  | -0.037     | -1+x,y,z         |
| 2                        | O5    | C32   | 2.906  | -0.314     | 1-x,-1/2+y,1/2-z |
| 3                        | O5    | H32   | 2.444  | -0.276     | 1-x,-1/2+y,1/2-z |
| 4                        | C1    | H31   | 2.710  | -0.190     | 1-x,1-y,1-z      |
| <b>1:4, T = 240 K</b>    |       |       |        |            |                  |
| 1                        | C34   | C28   | 3.367  | -0.033     | -1+x,y,z         |
| 2                        | O5    | C32   | 2.909  | -0.311     | 1-x,-1/2+y,1/2-z |
| 3                        | O5    | H32   | 2.432  | -0.288     | 1-x,-1/2+y,1/2-z |
| 4                        | C1    | H31   | 2.722  | -0.178     | 1-x,1-y,1-z      |
| <b>1:4, T = 200 K</b>    |       |       |        |            |                  |
| 1                        | C34   | C28   | 3.356  | -0.044     | -1+x,y,z         |
| 2                        | O5    | C32   | 2.905  | -0.315     | 1-x,-1/2+y,1/2-z |
| 3                        | O5    | H32   | 2.424  | -0.296     | 1-x,-1/2+y,1/2-z |
| 4                        | C4    | H12A  | 2.893  | -0.007     | 1-x,-y,1-z       |
| 5                        | C1    | H31   | 2.694  | -0.206     | 1-x,1-y,1-z      |
| 6                        | C6    | H31   | 2.887  | -0.013     | 1-x,1-y,1-z      |
| 7                        | C29   | C31   | 3.390  | -0.010     | 1-x,1-y,1-z      |
| <b>1:4, T = 150 K</b>    |       |       |        |            |                  |
| 1                        | C34   | C28   | 3.341  | -0.059     | -1+x,y,z         |
| 2                        | O5    | C32   | 2.904  | -0.316     | 1-x,-1/2+y,1/2-z |
| 3                        | O5    | H32   | 2.422  | -0.298     | 1-x,-1/2+y,1/2-z |
| 4                        | H23B  | H42C  | 2.388  | -0.012     | 1-x,-1/2+y,1/2-z |
| 5                        | C4    | H12A  | 2.861  | -0.039     | 1-x,-y,1-z       |
| 6                        | C1    | H31   | 2.670  | -0.230     | 1-x,1-y,1-z      |
| 7                        | C6    | H31   | 2.848  | -0.052     | 1-x,1-y,1-z      |
| 8                        | C29   | C31   | 3.359  | -0.041     | 1-x,1-y,1-z      |
| <b>1:8, T = 240 K</b>    |       |       |        |            |                  |

|                          |     |      |       |        |                  |
|--------------------------|-----|------|-------|--------|------------------|
| 1                        | C34 | C28  | 3.371 | -0.029 | -1+x,y,z         |
| 2                        | O5  | C32  | 2.913 | -0.307 | 1-x,-1/2+y,1/2-z |
| 3                        | O5  | H32  | 2.431 | -0.289 | 1-x,-1/2+y,1/2-z |
| 4                        | C1  | H31  | 2.731 | -0.169 | 1-x,1-y,1-z      |
| <b>1:8, T = 200 K</b>    |     |      |       |        |                  |
| 1                        | C34 | C28  | 3.355 | -0.045 | -1+x,y,z         |
| 2                        | O5  | C32  | 2.911 | -0.309 | 1-x,-1/2+y,1/2-z |
| 3                        | O5  | H32  | 2.429 | -0.291 | 1-x,-1/2+y,1/2-z |
| 4                        | C4  | H12A | 2.899 | -0.001 | 1-x,-y,1-z       |
| 5                        | C1  | H31  | 2.696 | -0.204 | 1-x,1-y,1-z      |
| 6                        | C6  | H31  | 2.888 | -0.012 | 1-x,1-y,1-z      |
| 7                        | C29 | C31  | 3.392 | -0.008 | 1-x,1-y,1-z      |
| <b>1:8, T = 130 K</b>    |     |      |       |        |                  |
| 1                        | C34 | C28  | 3.343 | -0.057 | -1+x,y,z         |
| 2                        | O5  | C32  | 2.902 | -0.318 | 1-x,-1/2+y,1/2-z |
| 3                        | O5  | H32  | 2.422 | -0.298 | 1-x,-1/2+y,1/2-z |
| 4                        | C4  | H12A | 2.866 | -0.034 | 1-x,-y,1-z       |
| 5                        | C1  | H31  | 2.675 | -0.225 | 1-x,1-y,1-z      |
| 6                        | C6  | H31  | 2.856 | -0.044 | 1-x,1-y,1-z      |
| 7                        | C29 | C30  | 3.396 | -0.004 | 1-x,1-y,1-z      |
| 8                        | C29 | C31  | 3.376 | -0.024 | 1-x,1-y,1-z      |
| <b>2 (Ni), T = 240 K</b> |     |      |       |        |                  |
| 1                        | C34 | C28  | 3.353 | -0.047 | -1+x,y,z         |
| 2                        | O5  | C32  | 2.904 | -0.316 | 1-x,-1/2+y,1/2-z |
| 3                        | O5  | H32  | 2.411 | -0.309 | 1-x,-1/2+y,1/2-z |
| 4                        | C1  | H31  | 2.712 | -0.188 | 1-x,1-y,1-z      |
| 5                        | C6  | H31  | 2.894 | -0.006 | 1-x,1-y,1-z      |
| 6                        | C29 | C31  | 3.398 | -0.002 | 1-x,1-y,1-z      |
| <b>2 (Ni), T = 100 K</b> |     |      |       |        |                  |
| 1                        | C34 | C28  | 3.320 | -0.080 | -1+x,y,z         |
| 2                        | O5  | C32  | 2.913 | -0.307 | 1-x,-1/2+y,1/2-z |
| 3                        | O5  | H32  | 2.434 | -0.286 | 1-x,-1/2+y,1/2-z |
| 4                        | C4  | H12A | 2.859 | -0.041 | 1-x,-y,1-z       |
| 5                        | C1  | H31  | 2.659 | -0.241 | 1-x,1-y,1-z      |
| 6                        | C6  | H31  | 2.841 | -0.059 | 1-x,1-y,1-z      |
| 7                        | C29 | C30  | 3.386 | -0.014 | 1-x,1-y,1-z      |
| 8                        | C29 | C31  | 3.354 | -0.046 | 1-x,1-y,1-z      |

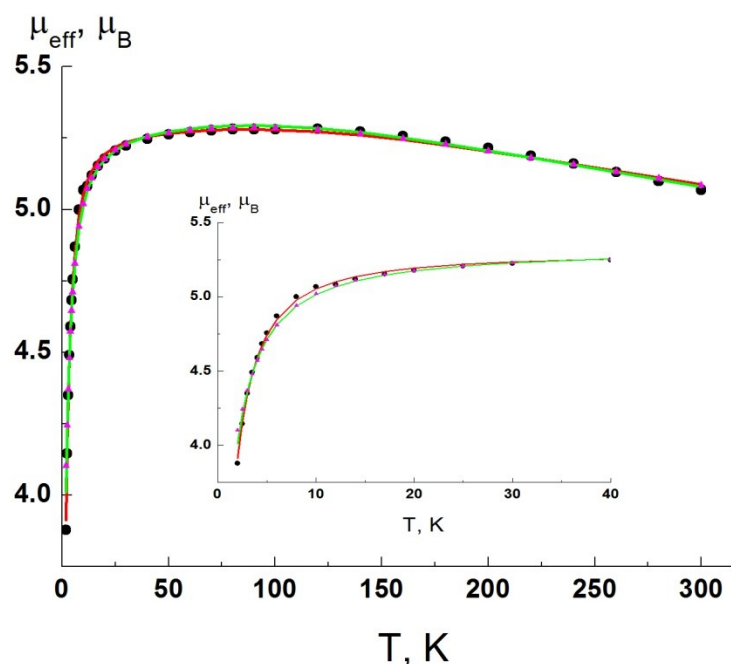

Figure S1. Temperature dependences of the effective magnetic moment for complex **2**. Solid lines are theoretical curves for different models.

Different models may be used for the analysis of the experimental  $\mu_{\text{eff}}(T)$  dependence for the complex **2**. Magenta triangles ( $\blacktriangle$ ) correspond to the simplest model with the best fit parameters  $g_{\text{Ni}} = 2.17 \pm 0.01$ ,  $g_{\text{SQ}} = g_{\text{TEMPO}} = 2.0$  (fixed),  $J_{\text{Ni-SQ}} = 154 \pm 4 \text{ cm}^{-1}$ ;  $J_{\text{Ni-NO}} = -1.70 \pm 0.03 \text{ cm}^{-1}$  (Spin Hamiltonian  $H = -2 J_{\text{Ni-SQ}} \cdot (S_{\text{Ni}} S_{\text{SQ1}} + S_{\text{Ni}} S_{\text{SQ2}}) - J_{\text{Ni-NO}} \cdot S_{\text{Ni}} S_{\text{NN}}$ ). Red line corresponds to the model with ZFS parameter  $D$  taken into account with the best fit parameters  $g_{\text{Ni}} = 2.13 \pm 0.01$ ,  $g_{\text{SQ}} = g_{\text{TEMPO}} = 2.0$  (fixed),  $J_{\text{Ni-SQ}} = 162 \pm 2 \text{ cm}^{-1}$ ;  $J_{\text{Ni-NO}} = -1.14 \pm 0.06$ ,  $D = 12.9 \pm 1.2 \text{ cm}^{-1}$  (Spin Hamiltonian  $H = -2 J_{\text{Ni-SQ}} \cdot (S_{\text{Ni}} S_{\text{SQ1}} + S_{\text{Ni}} S_{\text{SQ2}}) - J_{\text{Ni-NO}} \cdot S_{\text{Ni}} S_{\text{NN}} - D \cdot S_z^2_{\text{Ni}}$ ) and green line corresponds to the model with intermolecular exchange interactions  $zJ'$  instead of ZFS parameter  $D$  for Ni(II) ion. The difference between theoretical curves is small, but models with zero-field splitting parameter  $D$  or intermolecular exchange interactions  $zJ'$  describe experimental  $\mu_{\text{eff}}(T)$  dependence slightly better in the low temperature region in comparison with the simplest model. The models are not sensitive to the exchange interactions  $J_{\text{SQ-SQ}}$  between semiquinone ligands, and to avoid overparameterization it was fixed at  $J_{\text{SQ-SQ}} = 0$ .

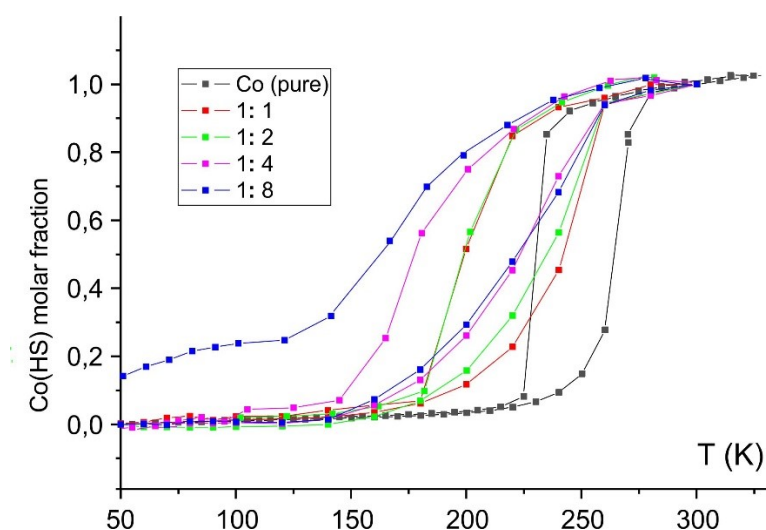

Figure S2. Temperature dependence of the mole fraction of high spin redox isomer.

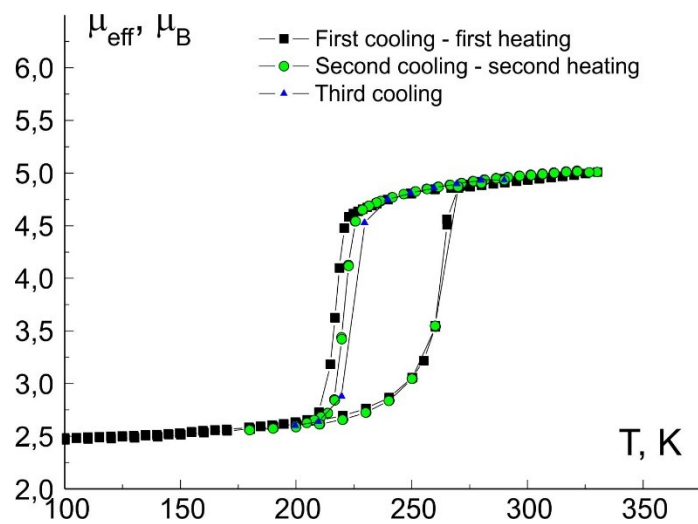

Figure S3. Temperature dependences of the effective magnetic moment for complex **1** during several cooling-heating cycles: 300 K  $\rightarrow$  2 K  $\rightarrow$  330 K ( $\blacksquare$ ); 330 K  $\rightarrow$  180 K  $\rightarrow$  290 K ( $\bullet$ ); 290 K  $\rightarrow$  200 K ( $\blacktriangle$ ).

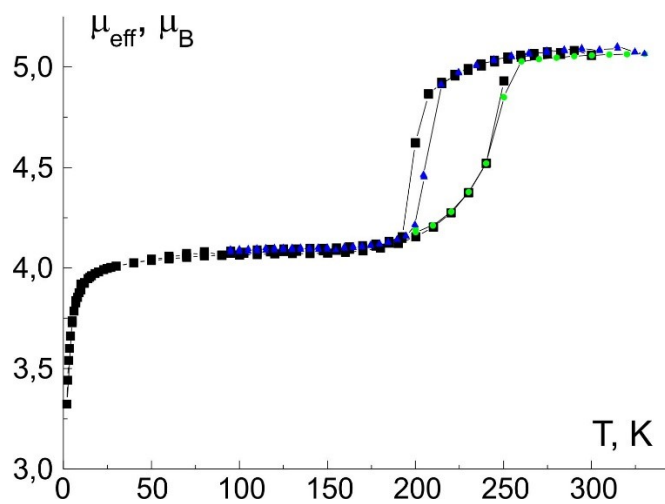

Figure S4. Temperature dependences of the effective magnetic moment for 1:1 solid solution during several cooling-heating cycles: 300 K  $\rightarrow$  2 K  $\rightarrow$  250 K ( $\blacksquare$ ); 200 K  $\rightarrow$  330 K ( $\bullet$ ) and 330 K  $\rightarrow$  95 K ( $\blacktriangle$ ).



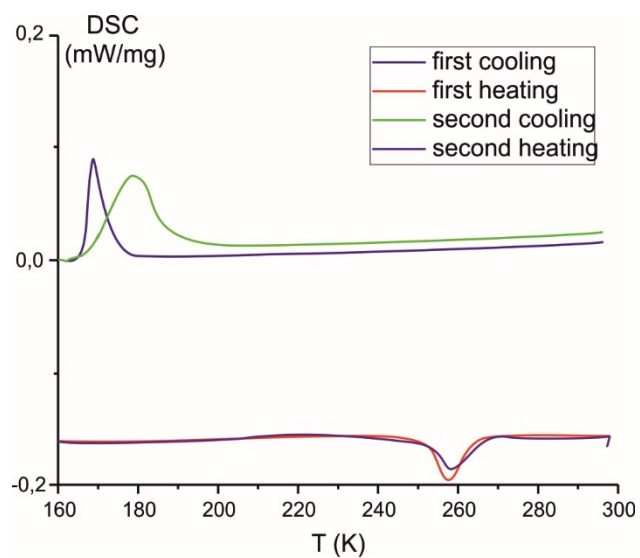

Figure S5. DSC curves for solid solution of 1:2 in the cooling and heating modes.

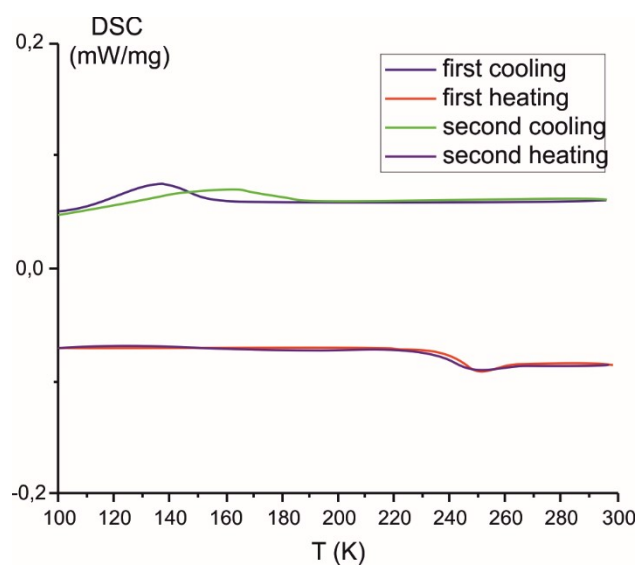

Figure S6. DSC curves for solid solution of 1:4 in the cooling and heating modes.

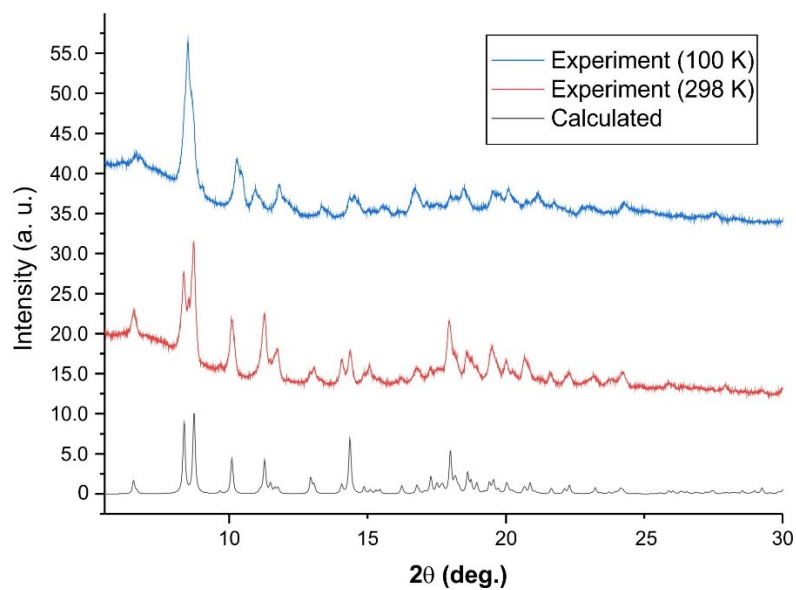

Figure S7. Powder XRD patterns of 1:4 solid solution (experimental at two temperatures and calculated from SC-XRD).

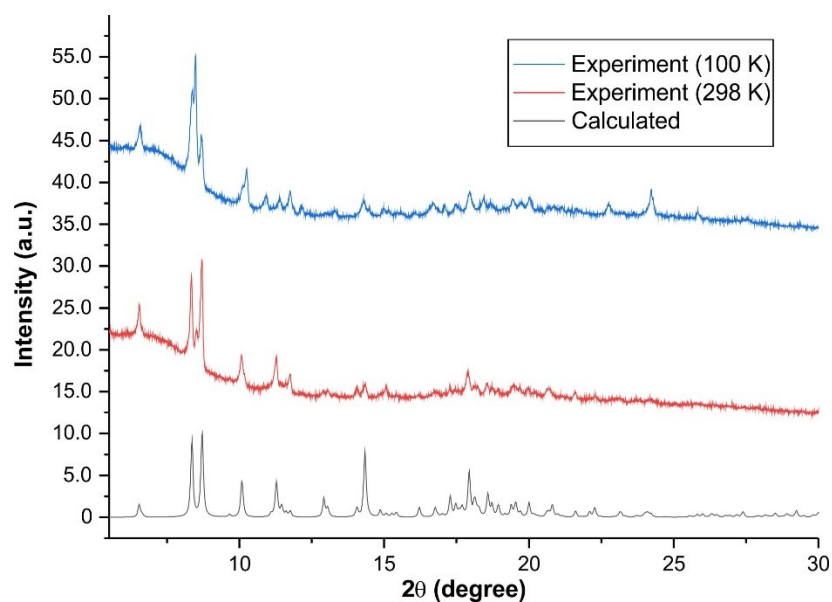

Figure S8. Powder XRD patterns of 1:8 solid solution (experimental at two temperatures and calculated from SC-XRD).

---

\* Alexey A. Zolotukhin, Michael P. Bubnov, Alla V. Arapova, Georgy K. Fukin, Roman V. Romyantsev, Artem S. Bogomyakov, Alexander V. Knyazev, Vladimir K. Cherkasov, The valence tautomeric interconversion in bis-dioxolene cobalt complex with imino-pyridine functionalized by TEMPO moiety. Phase transition coupled with monocrystals destruction. *Inorg. Chem.* 2017, 56, 14751–14754.

\*\* According to the Espinosa–Molins–Lecomte correlation: Espinosa, E.; Molins, E.; Lecomte, C. Hydrogen bond strengths revealed by topological analyses of experimentally observed electron densities. *Chemical Physics Letters*, 1998, 285, 170–173.
